# Supplementary material for: Improved Benefit Risk Profile of Rivaroxaban in a Subpopulation of the MAGELLAN Study
Source: PubMed Central journal article supplement (PMC7019408; doi:10.1177/1076029619886022), 2019-11-20
Supplement: Spyropoulos.Supplementary_14_Aug_2019_final.pdf [file Spyropoulos.Supplementary_14_Aug_2019_final.pdf]

**Supplementary Table 1** Number of subjects per analysis set in MAGELLAN and MAGELLAN Subpopulation

| Analysis set | MAGELLAN    |            |       | MAGELLAN Subpopulation |            |       |
|--------------|-------------|------------|-------|------------------------|------------|-------|
|              | Rivaroxaban | Enoxaparin | Total | Rivaroxaban            | Enoxaparin | Total |
| Randomized   | 4050        | 4051       | 8101  | ---                    | ---        | ---   |
| Safety       | 3997        | 4001       | 7998  | 3218                   | 3229       | 6447  |
| mITT Day 35  | 2967        | 3057       | 6024  | 2419                   | 2506       | 4925  |
| PP Day 10    | 2938        | 2993       | 5931  | 2385                   | 2433       | 4818  |
| mITT Day 10  | 3232        | 3271       | 6503  | 2608                   | 2659       | 5267  |
| PP Day 35    | 2516        | 2586       | 5102  | 2066                   | 2134       | 4200  |

mITT, modified Intent to Treat; PP, per protocol.

**Supplementary Table 2** Reasons to exclude from the MAGELLAN Subpopulation (safety analysis set)

| Exclusion criteria                               | Rivaroxaban | Enoxaparin/<br>Placebo | Total       |
|--------------------------------------------------|-------------|------------------------|-------------|
|                                                  | N = 779     | N = 772                | N = 1551    |
| Active cancer at randomization                   | 294 (37.7%) | 290 (37.6%)            | 584 (37.7%) |
| Dual antiplatelet therapy at baseline            | 246 (31.6%) | 233 (30.2%)            | 479 (30.9%) |
| Baseline bronchiectasis/<br>pulmonary cavitation | 60 (7.7%)   | 61 (7.9%)              | 121 (7.8%)  |
| Active gastroduodenal ulcer                      | 116 (14.9%) | 116 (15.0%)            | 232 (15.0%) |
| Bleeding in 3 months prior to<br>randomization   | 126 (16.2%) | 133 (17.2%)            | 259 (16.7%) |

Patients who met high risk bleeding exclusion criteria.

**Supplementary Table 3** Fatal Bleeding in MAGELLAN

| Treatment Group          | Duration of Study Drug | On-set of AE Study Day | Death Study Day | Age/Sex    | Relevant Medical History                            | Bleeding Site    |
|--------------------------|------------------------|------------------------|-----------------|------------|-----------------------------------------------------|------------------|
| Rivaroxaban              | 2                      | 3                      | 3               | 62, Male   | Bronchiectasis, COPD, septicemia, tuberculosis      | Pulmonary        |
| Rivaroxaban              | 8                      | 8                      | 9               | 52, Male   | Bronchiectasis, COPD, hemoptysis, HF, kidney injury | Pulmonary        |
| Rivaroxaban              | 11                     | 12                     | 13              | 44, Female | Active lung cancer, COPD                            | Pulmonary        |
| Rivaroxaban              | 3                      | 4                      | 6               | 79, Male   | Bronchiectasis, COPD, pneumonia                     | Gastrointestinal |
| Rivaroxaban <sup>a</sup> | 5                      | 5                      | 8               | 70, Male   | Afib, COPD, HF, HTN, MI, Renal insufficiency        | Intracranial     |
| Rivaroxaban <sup>a</sup> | 33                     | 33                     | 34              | 85, Male   | COPD, DM, HTN, pneumonia                            | Intracranial     |
| Rivaroxaban <sup>a</sup> | 11                     | 11                     | 22              | 70, Male   | DM, HTN, liver steatosis                            | Retroperitoneal  |
| Enoxaparin <sup>a</sup>  | 2                      | 3                      | 3               | 86, Male   | Suspected bronchial neoplasm, HTN, HF, UTI          | Tracheal         |

Afib, Atrial Fibrillation; COPD, chronic obstructive pulmonary disease; DM, Diabetes Mellitus; HTN, arterial hypertension; HF, Heart Failure; MI, myocardial infarction; UTI, Urinary Tract infection. <sup>a</sup>Fatal Bleeding in MAGELLAN subpopulation.
